# Supplementary material
Source: PubMed Central journal article supplement (PMC5148200)
Supplement: ismej201679x2.pdf [file ismej201679x2.pdf]

| <b>Pae#</b> | <b>Designation</b> | <b>Place of Isolation</b>      | <b>Source</b>            | <b>Origin</b>     |
|-------------|--------------------|--------------------------------|--------------------------|-------------------|
| 1           | PA01               | Australia                      | human                    | burn              |
| 2           | PA14               |                                | human                    | burn              |
| 4           | PAK (PA06)         |                                | human                    | cystic fibrosis   |
| 6           | PA191517           | Toronto, ON                    | human                    | cystic fibrosis   |
| 7           | PA100683           | Toronto, ON                    | human                    | cornea            |
| 8           | PA5525             | Toronto, ON                    | human                    | rectal swab       |
| 9           | PA131533           | Toronto, ON                    | human                    | liver abcess      |
| 10          | PA4944             | Toronto, ON                    | human                    | rectal swab       |
| 12          | PA5196             | Toronto, ON                    | human                    | rectal swab       |
| 13          | PA87110594         | Toronto, ON                    | human                    | endotracheal tube |
| 14          | PA100420           | Toronto, ON                    | human                    | cystic fibrosis   |
| 15          | RR1                | Madrid, Sapin                  | oil-contaminated soil    |                   |
| 16          | CECT116            | Spain                          | aminal room water bottle |                   |
| 18          | ATCC14886          | America                        | soil                     |                   |
| 19          | ATCC15524          | America                        | soil                     |                   |
| 20          | ATCC15528          | America                        | soil                     |                   |
| 21          | ATCC21472          | America                        | soil                     |                   |
| 22          | RYC25616           | Madrid, Spain                  | human                    | cystic fibrosis   |
| 25          | RYC28290           | Madrid, Spain                  | human                    | cystic fibrosis   |
| 28          | RYC97083283        | Madrid, Spain                  | human                    | bacteraemia       |
| 35          | RYC16469           | Madrid, Spain                  | human                    | bacteraemia       |
| 40          | CFS2               | University of British Columbia | human                    | cystic fibrosis   |
| 42          | CFS4               | University of British Columbia | human                    | cystic fibrosis   |
| 45          | CF017              | Denmark                        | human                    | cystic fibrosis   |
| 46          | CF040              | N. Carolina, USA               | human                    | cystic fibrosis   |
| 47          | CF049              | University of British Columbia | human                    | cystic fibrosis   |
| 48          | CF5                | Scotland                       | human                    | cystic fibrosis   |
| 50          | CF25               | Scotland                       | human                    | cystic fibrosis   |
| 52          | CF37               | Scotland                       | human                    | cystic fibrosis   |
| 54          | CF149              | Boston, MA, USA                | human                    | cystic fibrosis   |
| 55          | 104035             | Houston, TX, USA               | human                    | biopsy            |
| 56          | 114199             | Houston, TX, USA               | human                    | sputum            |
| 58          | 203097             | Houston, TX, USA               | human                    | wound             |
| 60          | 311058             | Houston, TX, USA               | human                    | sputum            |
| 62          | ERC-1              | Bozeman, MT, USA               | Environment              |                   |

|     |              |                                |                                    |                             |
|-----|--------------|--------------------------------|------------------------------------|-----------------------------|
| 63  | ENV42        | University of British Columbia | Environment                        |                             |
| 64  | OR           | West Virginia, USA             | Environment                        |                             |
| 64  | OR           | West Virginia, USA             | Environment                        |                             |
| 68  | CF011        | Denmark                        | human                              | cystic fibrosis             |
| 71  | PA2048       | San Francisco, CA, USA         | human                              | lung transplant-trachea     |
| 72  | PA1032       | San Francisco, CA, USA         | human                              | acute infection-resp. tract |
| 73  | PA2046       | San Francisco, CA, USA         | human                              | acute infection-resp. tract |
| 75  | PA103        |                                | human                              |                             |
| 77  | Env23 DJ     | Toronto, Canada                | soil                               |                             |
| 78  | Env24 DJ     | Toronto, Canada                | soil                               |                             |
| 79  | Env25 DJ     | Toronto, Canada                | soil                               |                             |
| 80  | Env34 DJ     | Toronto, Canada                | soil                               |                             |
| 81  | Env63 BP     | Damascus, Canada               | soil                               |                             |
| 83  | Env110 BP    | Toronto, Canada                | soil                               |                             |
| 85  | EnvJH        | Joker's Hill, Canada           | soil                               |                             |
| 86  | EnvHM        | Holland Marsh, Canada          | soil                               |                             |
| 87  | T4347        | Trinidad                       | human                              |                             |
| 90  | T5255        | Trinidad                       | human                              |                             |
| 93  | T4826        | Trinidad                       | human                              |                             |
| 96  | T4464        | Trinidad                       | human                              |                             |
| 100 | EnvJH2       | Joker's Hill, Canada           | soil                               |                             |
| 103 | Env201       | Toronto, Canada                | soil                               |                             |
| 104 | Env203       | Toronto, Canada                | soil                               |                             |
| 105 | EnvBC10      | Vancouver, Canada              | soil                               |                             |
| 106 | EnvBC13      | Vancouver, Canada              | soil                               |                             |
| 107 | EnvBC15      | Granville Island, Canada       | soil                               |                             |
| 108 | EnvBC17      | University of British Columbia | soil                               |                             |
| 109 | EnvBC20      | Vancouver, Canada              | soil                               |                             |
| 110 | EnvSG4       | Toronto, Canada                | water at soil, covered in duckweed |                             |
| 111 | EnvKY1       | Maysville, KY, USA             | soil                               |                             |
| 112 | EnvKY2       | Maysville, KY, USA             | soil                               |                             |
| 113 | EnvCIN1      | Cincinatti, OH, USA            | soil/water                         |                             |
| 115 | STH_U9-19005 | Malmo, Sweden                  | human                              | urine                       |
| 117 | STH_PA3      | Stockholm, Sweden              | human                              | tracheal secretion          |
| 119 | STH_PA84     | Stockholm, Sweden              | human                              | pancreatic secretion, CF    |
| 121 | HUN_PA583    | Pecs, Hungary                  | human                              | throat                      |
| 123 | HUN_PA576    | Ajka, Hungary                  | human                              | trachea                     |

|     |              |                                              |       |                          |
|-----|--------------|----------------------------------------------|-------|--------------------------|
| 125 | HUN_PA555    | Pecs, Hungary                                | human | urine                    |
| 127 | ITL_85MG     | Pavia, Italy                                 | human |                          |
| 129 | ITL_134MG    | Pavia, Italy                                 | human |                          |
| 131 | ITL_PPV108   | Pavia, Italy                                 | human |                          |
| 133 | ITL_TS832035 | Trieste, Italy                               | human |                          |
| 139 | PHU149       | Federal University of Rio de Janeiro, Brazil | human | urine                    |
| 142 | PHU56        | Federal University of Rio de Janeiro, Brazil | human | osteomyelitis            |
| 145 | ATCC7700     | Ponce, Puerto Rico                           | water |                          |
| 146 | ATCC260      | USA                                          | human | pathological lesions     |
| 149 | ATCC97       | Walter Reed Army Medical Center, USA         | human | pathological lesions     |
| 152 | PsVir03      | Calgary, Canada                              | human | urine, ACC1 - outpatient |
| 154 | PsVir05      | Calgary, Canada                              | human | urine, ACC1 outpatient   |
| 157 | C-6          | Calgary, Canada                              |       |                          |
| 160 | SA2          | South Africa                                 | water | golf course pond         |
| 169 | 2709         | Brussels, Belgium                            | human | Urinary tract            |
| 265 | AFC-02       | Kenya, Africa via Calgary, AB, Canada        | human | Pus                      |

Strains Selected as panel of indicator strains
