# Supplementary material
Source: PubMed Central journal article supplement (PMC5148200)
Supplement: ismej201679x3.pdf [file ismej201679x3.pdf]

Supplementary Table 2. Properties of phage genomes

| Phage  | Genome Size (bp) | # Predicted ORFs | Closely Related Characterized Phage | % of Similar ORFs (BLAST e-value < 0.001) | NCBI Accession # | Morphology |
|--------|------------------|------------------|-------------------------------------|-------------------------------------------|------------------|------------|
| JBD44  | 49033            | 80               | D3*                                 | 30%                                       | KU199710         | Siphophage |
|        |                  |                  | Phi297                              | 34%                                       |                  |            |
| JBD88b | 48826            | 79               | D3                                  | 35%                                       | KM389212         | Siphophage |
|        |                  |                  | Phi297                              | 32%                                       |                  |            |
| JBD18  | 39014            | 52               | B3                                  | 87%                                       | JX495041         | Siphophage |
| JBD25  | 39552            | 55               | B3                                  | 65%                                       | JX495042         | Siphophage |
| JBD67  | 38232            | 57               | B3                                  | 82%                                       | JX495043         | Siphophage |
| JBD68  | 39841            | 65               | F10                                 | 72%                                       | KM389266         | Siphophage |
| JBD90  | 61245            | 69               | F116                                | 71%                                       | KM389247         | Podophage  |
| JBD24  | 37095            | 58               | MP22                                | discussed In paper                        | JX434031         | Siphophage |
| JBD26  | 37840            | 61               | MP22                                | discussed In paper                        | JN811560         | Siphophage |
| JBD30  | 36947            | 56               | MP22                                | discussed In paper                        | JX434032         | Siphophage |
| JBD93  | 36629            | 61               | MP22                                | discussed In paper                        | KU199709         | Siphophage |
| JBD88a | 36429            | 55               | MP22                                | discussed In paper                        | JX434033         | Siphophage |
| JBD23  | 37173            | 58               | MP22                                | discussed In paper                        | KM389462         | Siphophage |
| JBD69  | 36938            | 57               | MP22                                | discussed In paper                        | KU199708         | Siphophage |
| JBD5   | 37740            | 59               | MP22                                | discussed In paper                        | JX434030         | Siphophage |
| JBD16C | 36436            | 53               | MP22                                | discussed In paper                        | KU199707         | Siphophage |
| JBD26  | 37840            | 61               | MP22                                | discussed In paper                        | JN811560         | Siphophage |
| MP29   | 36632            | 55               | MP22                                | discussed In paper                        | EU272036         | Siphophage |
| MP22   | 36409            | 55               | MP22                                | discussed In paper                        | DQ873690         | Siphophage |

\*The ORF sets denoted as similar to D3 and phi297 are not overlapping. Some ORFs are similar to ORFs in both phages. In these cases, we counted the D3 or phi297 ORF that was most similar to the phage ORF in question.
