# Supplementary material
Source: PubMed Central journal article supplement (PMC5148200)
Supplement: ismej201679x4.pdf [file ismej201679x4.pdf]

**Supplementary Table 3** Genes present in all the sequenced T4P-dependent phages used in this study. Conserved genes found in every phage are shaded grey. The genomes in which particular accessory genes (AG) appear are indicated.

| Accessory Protein              | Length | Phage Genomes |        |        |        |         |        |        |        |         |        |        | Refseq ID of one Example | Putative Function or Sequence Similarity |                   |
|--------------------------------|--------|---------------|--------|--------|--------|---------|--------|--------|--------|---------|--------|--------|--------------------------|------------------------------------------|-------------------|
|                                |        | JBD24         | JBD30  | JBD93  | JBD88  | MP29    | JBD23  | JBD69  | JBD5   | MP22    | JBD16C | JBD8   |                          |                                          | JBD26             |
| CG1                            |        |               |        |        |        |         |        |        |        |         |        |        | YP_001469130.1           | cl-like repressor                        |                   |
| CG2                            |        |               |        |        |        |         |        |        |        |         |        |        | YP_001469131.1           | Ner-like repressor                       |                   |
| CG3                            |        |               |        |        |        |         |        |        |        |         |        |        | YP_001469132.1           |                                          |                   |
| AG1                            | 108    |               | AG1    |        |        | AG1     | AG1    | AG1    |        |         |        | AG1    | AG1                      | YP_007392311.1                           |                   |
| AG2                            | 89     |               |        | AG2    | AG2    |         |        |        | AG2    | AG2     | AG2    |        |                          | YP_007392708.1                           |                   |
| AG3                            | 84     |               | AG3    |        |        |         |        |        |        |         |        | AG3    |                          | YP_007392312.1                           |                   |
| AG4                            | 136    |               |        |        |        | AG4     | AG4    | AG4    |        |         |        |        | AG4                      | YP_002332430.1                           |                   |
| AG5                            | 143    | AG5           |        |        |        |         |        |        |        |         |        |        |                          | YP_007392767.1                           |                   |
| CG4                            |        |               |        |        |        |         |        |        |        |         |        |        | YP_001469134.1           | Transposase A                            |                   |
| CG5                            |        |               |        |        |        |         |        |        |        |         |        |        | YP_001469135.1           | Transposase B                            |                   |
| CG6                            |        |               |        |        |        |         |        |        |        |         |        |        | YP_001469136.1           |                                          |                   |
| AG6                            | 211    |               | AG6    | AG6    |        |         |        |        | AG6    |         |        |        | AG6                      | YP_007392316.1                           |                   |
| CG7                            |        |               |        |        |        |         |        |        |        |         |        |        | YP_001469137.1           |                                          |                   |
| CG8                            |        |               |        |        |        |         |        |        |        |         |        |        | YP_001469138.1           |                                          |                   |
| CG9                            |        |               |        |        |        |         |        |        |        |         |        |        | YP_001469139.1           |                                          |                   |
| CG10                           |        | CG10 N        | CG10 N | CG10 N | CG10 N | CG10 FL | CG10 N | CG10 N | CG10 N | CG10 FL | CG10 N | CG10 N | CG10 N                   | YP_001469140.1                           | Similar to Mu Gam |
| AG7                            | 92     | AG7           |        | AG7    |        |         |        |        | AG7    | AG7     |        |        | AG7                      | YP_007392717.1                           |                   |
| AG8                            | 67     |               | AG8    |        |        |         |        |        |        |         |        |        |                          | YP_007392718.1                           |                   |
| AG9                            | 102    | AG9           | AG9    |        | AG9    | AG9     | AG9    |        |        | AG9     | AG9    |        |                          | YP_007392321.1                           |                   |
| AG10                           | 73     |               |        | AG10   |        |         |        | AG10   | AG10   |         |        |        | AG10                     | YP_007392719.1                           |                   |
| CG11                           |        | CG11 N        | CG11 N | CG11 N | CG11 N | CG11 FL | CG11 N | CG11 N | CG11 N | CG11 FL | CG11 N | CG11 N | CG11 N                   | YP_001469142.1                           |                   |
|                                |        | CG11 C        | CG11 C | CG11 C | CG11 C | CG11 C  | CG11 C | CG11 C | CG11 C | CG11 C  | CG11 C | CG11 C | CG11 C                   | YP_007392324.1                           |                   |
| AG11                           | 149    |               |        |        |        |         | AG11   |        |        |         |        |        | AG11                     | YP_001469143.1                           |                   |
| CG12                           | 73     |               |        |        |        |         |        | AG12   |        |         |        |        | AG12                     |                                          |                   |
| AG12                           | 224    | AG13          |        |        |        |         |        |        |        |         |        |        |                          | YP_007392780.1                           |                   |
| AG14                           | 98     | AG14          | AG14   | AG14   | AG14   | AG14    | AG14   |        | AG14   | AG14    | AG14   |        | AG14                     | YP_007392326.1                           |                   |
| CG13                           |        |               |        |        |        |         |        |        |        |         |        |        | YP_001469145.1           |                                          |                   |
| CG14                           |        |               |        |        |        |         |        |        |        |         |        |        | YP_001469146.1           | Mor transcription activator              |                   |
| CG15                           |        |               |        |        |        |         |        |        |        |         |        |        | YP_001469147.1           | hoIn                                     |                   |
| CG16                           |        |               |        |        |        |         |        |        |        |         |        |        | YP_001469148.1           | peptidoglycan degrading                  |                   |
| CG17                           |        |               |        |        |        |         |        |        |        |         |        |        | YP_001469149.1           |                                          |                   |
| AG15                           | 80     | AG15          | AG15   | AG15   |        | AG15    | AG15   | AG15   | AG15   | AG15    | AG15   |        | AG15                     | YP_007392729.1                           |                   |
| AG16                           | 39     |               | AG16   |        |        |         | AG16   |        |        |         |        | AG16   | AG16                     | YP_007392332.1                           |                   |
| CG18                           |        |               |        |        |        |         |        |        |        |         |        |        | YP_001469151.1           | RZ-like lysis                            |                   |
| AG17                           | 37     | AG17          | AG17   | AG17   | AG17   |         | AG17   | AG17   | AG17   |         | AG17   | AG17   | AG17                     | YP_007392334.1                           |                   |
| CG19                           |        |               |        |        |        |         |        |        |        |         |        |        | YP_001469152.1           |                                          |                   |
| CG20                           |        |               |        |        |        |         |        |        |        |         |        |        | YP_001469153.1           | Small Terminase Subunit                  |                   |
| AG18                           | 83     | AG18          |        |        |        |         |        |        |        |         |        |        | AG18                     | YP_007392792.1                           |                   |
| AG19                           | 164    |               | AG19   |        |        |         |        | AG19   |        |         |        |        | AG19                     | YP_007392337.1                           |                   |
| AG20                           | 83     | AG20          |        |        |        |         |        |        |        |         |        |        | AG20                     | YP_007392793.1                           |                   |
| CG21                           |        |               |        |        |        |         |        |        |        |         |        |        | YP_001469154.1           | Large Terminase Subunit                  |                   |
| CG22                           |        |               |        |        |        |         |        |        |        |         |        |        | YP_001469155.1           | Portal                                   |                   |
| CG23                           |        |               |        |        |        |         |        |        |        |         |        |        | YP_001469156.1           | Similar to Mu gpF                        |                   |
| CG24                           |        |               |        |        |        |         |        |        |        |         |        |        | YP_001469157.1           | Similar to Mu gpG                        |                   |
| anti-CRISPR                    |        |               |        | acr    | acr    |         |        | acr    | acr    | acr     | acr    |        |                          | YP_001469158.1                           |                   |
| anti-CRISPR                    |        |               |        | acr    | acr    |         |        | acr    | acr    | acr     | acr    |        |                          | YP_001469159.1                           |                   |
| anti-CRISPR                    |        | acr           |        |        |        |         |        |        |        |         |        |        | acr                      | YP_007392738.1                           |                   |
| anti-CRISPR                    |        |               |        |        |        |         | acr    | acr    | acr    |         |        |        |                          | YP_007392740.1                           |                   |
| anti-CRISPR                    |        | acr           | acr    |        |        |         |        | acr    |        |         |        | acr    | acr                      | YP_007392342.1                           |                   |
| anti-CRISPR                    |        |               |        |        | acr    |         |        |        |        |         |        |        |                          | YP_007392799.1                           |                   |
| anti-CRISPR                    |        |               |        |        |        | acr     |        |        |        |         |        |        |                          | YP_002332454.1                           |                   |
| anti-CRISPR associated         |        |               |        |        |        |         |        |        |        |         |        |        | YP_001469160.1           |                                          |                   |
| AG30                           | 41     | AG30          | AG30   | AG30   |        |         |        |        |        |         |        |        | AG30                     | YP_007392801.1                           |                   |
| CG25                           |        |               |        |        |        |         |        |        |        |         |        |        | YP_001469161.1           | Head Protease                            |                   |
| AG31                           | 132    |               |        |        | AG31   | AG31    |        | AG31   |        |         |        |        | AG31                     | YP_007392743.1                           |                   |
| CG26                           |        |               |        |        |        |         |        |        |        |         |        |        | YP_001469162.1           | Major Head                               |                   |
| CG27                           |        |               |        |        |        |         |        |        |        |         |        |        | YP_001469163.1           | Packaging Chaperone                      |                   |
| CG28                           |        |               |        |        |        |         |        |        |        |         |        |        | YP_001469164.1           |                                          |                   |
| CG29                           |        |               |        |        |        |         |        |        |        |         |        |        | YP_001469165.1           | Head-Tail Connector                      |                   |
| CG30                           |        |               |        |        |        |         |        |        |        |         |        |        | YP_001469166.1           | Tail Terminator                          |                   |
| CG31                           |        |               |        |        |        |         |        |        |        |         |        |        | YP_001469167.1           |                                          |                   |
| CG32                           |        |               |        |        |        |         |        |        |        |         |        |        | YP_001469168.1           | Tail Tube                                |                   |
| CG33                           |        |               |        |        |        |         |        |        |        |         |        |        | YP_001469169.1           | Tail Chaperone                           |                   |
| CG34                           |        |               |        |        |        |         |        |        |        |         |        |        | YP_001469170.1           | Tail Chaperone                           |                   |
| CG35                           |        |               |        |        |        |         |        |        |        |         |        |        | YP_001469171.1           | Tape Measure                             |                   |
| CG36                           |        |               |        |        |        |         |        |        |        |         |        |        | YP_001469172.1           | Tail Protein                             |                   |
| CG37                           |        |               |        |        |        |         |        |        |        |         |        |        | YP_001469173.1           | Tail Protein                             |                   |
| CG38                           |        |               |        |        |        |         |        |        |        |         |        |        | YP_001469174.1           | Tail Protein                             |                   |
| CG39                           |        |               |        |        |        |         |        |        |        |         |        |        | YP_001469175.1           | Tail Protein                             |                   |
| CG40                           |        |               |        |        |        |         |        |        |        |         |        |        | YP_001469176.1           | Tail Protein                             |                   |
| CG41                           |        |               |        |        |        |         |        |        |        |         |        |        | YP_001469177.1           | Tail Protein                             |                   |
| CG42                           |        |               |        |        |        |         |        |        |        |         |        |        | YP_001469178.1           | Tail Protein                             |                   |
| CG43                           |        |               |        |        |        |         |        |        |        |         |        |        | YP_001469179.1           |                                          |                   |
| CG44                           |        |               |        |        |        |         |        |        |        |         |        |        | YP_001469180.1           |                                          |                   |
| AG32                           | 66     | AG32          | AG32   | AG32   | AG32   |         | AG32   | AG32   | AG32   |         | AG32   | AG32   | AG32                     | YP_007392763.1                           |                   |
| <b>Accessory Genes (Total)</b> |        | 11            | 10     | 10     | 9      | 5       | 9      | 10     | 10     | 6       | 8      | 10     | 13                       |                                          |                   |
| anti-CRISPR                    |        | 3             | 2      | 2      | 3      | 2       | 3      | 2      | 3      | 3       | 2      | 2      | 3                        |                                          |                   |

Abbreviations: CG, conserved gene; AG, accessory gene; acr, anti-CRISPR; N, C, FL, CG10 and CG11 are present in full-length (FL) forms in some phages, while in others the N-terminal (N) and C-terminal (C) domains are separate open reading frames. Putative gene functions were assigned through BLAST searches and/or comparisons using HHpred REF-Söding, J. (2005). Protein homology detection by HMM-HMM comparison. *Bioinformatics* 21, 951-960.
