# Supplementary material
Source: PubMed Central journal article supplement (PMC5148200)
Supplement: ismej201679x5.pdf [file ismej201679x5.pdf]

**Supplementary Table 4. Conserved genes in the pilus-dependent phages**

| Conserved Gene # | Protein Similarity | Pairwise % identity in Cluster | Number of Sequence Clusters* | Minimum %ID Between Clusters** |
|------------------|--------------------|--------------------------------|------------------------------|--------------------------------|
| CG1              | YP_001469130.1     | cl-like repressor              | 4                            | 54                             |
| CG2              | YP_001469131.1     | Ner-like repressor             | 2                            | 67                             |
| CG3              | YP_001469132.1     |                                | > 90                         |                                |
| CG4              | YP_001469134.1     | Transposase A                  | > 95                         |                                |
| CG5              | YP_001469135.1     | Transposase B                  | > 90                         |                                |
| CG6              | YP_001469136.1     |                                | > 85                         |                                |
| CG7              | YP_001469137.1     |                                | > 85                         |                                |
| CG8              | YP_001469138.1     |                                | > 95                         |                                |
| CG9              | YP_001469139.1     |                                | > 90                         |                                |
| CG10             | YP_001469140.1     | Similar to Mu Gam              | > 90                         |                                |
| CG11             | YP_001469142.1     |                                | > 90                         |                                |
| CG12             | YP_001469143.1     |                                | > 90                         |                                |
| CG13             | YP_001469145.1     |                                | > 95                         |                                |
| CG14             | YP_001469146.1     | Mor transcription activator    | > 95                         |                                |
| CG15             | YP_001469147.1     |                                | > 90                         |                                |
| CG16             | YP_001469148.1     | holin                          | > 95                         |                                |
| CG17             | YP_001469149.1     | peptidoglycan degrading        | > 90                         |                                |
| CG18             | YP_001469151.1     | RZ-like lysis                  | > 85                         |                                |
| CG19             | YP_001469152.1     |                                | > 95                         |                                |
| CG20             | YP_001469153.1     | Small Terminase Subunit        | > 90                         |                                |
| CG21             | YP_001469154.1     | Large Terminase Subunit        | 2                            | 36                             |
| CG22             | YP_001469155.1     | Portal                         | > 85                         |                                |
| CG23             | YP_001469156.1     | Similar to Mu gpF              | > 90                         |                                |
| CG24             | YP_001469157.1     | Similar to Mu gpG              | > 85                         |                                |
| CG25             | YP_001469161.1     | Head Protease                  | > 85                         |                                |
| CG26             | YP_001469162.1     | Major Head                     | 2                            | 32                             |
| CG27             | YP_001469163.1     | Packaging Chaperone            | 3                            | 39                             |
| CG28             | YP_001469164.1     |                                | 2                            | 63                             |
| CG29             | YP_001469165.1     | Head-Tail Connector            | 2                            | 67                             |
| CG30             | YP_001469166.1     | Taill Terminator               | 2                            | 71                             |
| CG31             | YP_001469167.1     |                                | 2                            | 54                             |
| CG32             | YP_001469168.1     | Tail Tube                      | 2                            | 55                             |
| CG33             | YP_001469169.1     | Tail Chaperone                 | 3                            | 47                             |
| CG34             | YP_001469170.1     | Tail Chaperone                 | 3                            | 41                             |
| CG35             | YP_001469171.1     | Tape Measure                   | 3                            | 29                             |
| CG36             | YP_001469172.1     | Tail Protein-42                | > 95                         |                                |
| CG37             | YP_001469173.1     | Tail Protein-43                | > 90                         |                                |
| CG38             | YP_001469174.1     | Tail Protein-LM                | > 95                         |                                |
| CG39             | YP_001469175.1     | Tail Protein-LL                | > 90                         |                                |
| CG40             | YP_001469176.1     | Tail Protein-LI                | > 85                         |                                |
| CG41             | YP_001469177.1     | Tail Protein-M5                | > 90                         |                                |
| CG42             | YP_001469178.1     | Tail Protein-CF                | > 95                         |                                |
| CG43             | YP_001469179.1     |                                | > 90                         |                                |
| CG44             | YP_001469180.1     |                                | > 85                         |                                |

\* These proteins can be clustered into groups with sequence identity >90%. The number of clusters above this cutoff are noted.

\*\* Minimum percent identity between sequences within each cluster
