# Supplementary material
Source: PubMed Central journal article supplement (PMC5148200)
Supplement: ismej201679x6.pdf [file ismej201679x6.pdf]

**Supplementary Table 5. Non-conserved genes in the pilus-dependent phages**

| Accessory Gene | # residues | MP22-like  | Minimum % identity of Homologues | Found in non-MP22 phages | Phages Containing Homologues                                                 |
|----------------|------------|------------|----------------------------------|--------------------------|------------------------------------------------------------------------------|
| <b>AG1</b>     | 108        | yes        | 97%                              | no                       |                                                                              |
| <b>AG2</b>     | 69         | yes        | 51%                              | no                       |                                                                              |
| <b>AG3</b>     | 84         | yes        | 51%                              | no                       |                                                                              |
| <b>AG4</b>     | 136        | yes        | 47%                              | no                       |                                                                              |
| <b>AG5</b>     | 143        | yes        | 49%                              | no                       |                                                                              |
| <b>AG6</b>     | 211        | yes        | 41%                              | yes                      | Pseudomonas phages phi297, B3                                                |
| <b>AG7</b>     | 92         | yes        | 45%                              | yes                      | Various myophage prophages                                                   |
| <b>AG8</b>     | 67         | yes        | 42%                              | yes                      | Pseudomonas phage B3, myo prophages                                          |
| <b>AG9</b>     | 102        | yes        | 92%                              | no                       |                                                                              |
| <b>AG10</b>    | 73         | JBD5 only  | 61%                              | yes                      | Different type of prophage                                                   |
| <b>AG11</b>    | 149        | JBD8 only  | 34%                              | yes                      | Pseudomonas phage B3                                                         |
| <b>AG12</b>    | 73         | JBD8 only  | 40%                              | yes                      | Various prophages                                                            |
| <b>AG13</b>    | 224        | JBD24 only | 32%                              | yes                      | Diverse prophages                                                            |
| <b>AG14</b>    | 98         | JBD24 only | 85%                              | yes                      | Diverse prophages (DUF2786)                                                  |
| <b>AG15</b>    | 80         | yes        | 95%                              | no                       |                                                                              |
| <b>AG16</b>    | 39         | JBD30 only |                                  | no                       |                                                                              |
| <b>AG17</b>    | 37         | yes        | 92%                              | yes                      | Diverse prophages                                                            |
| <b>AG18</b>    | 83         | JBD24 only | 99%                              | no                       | Closely related <i>P. aeruginosa</i> prophages                               |
| <b>AG19</b>    | 164        | yes        | 30%                              | yes                      | Enterobacteria phage HK446<br>Salmonella phage HK620<br>Xylella phage Xfas53 |
| <b>AG20</b>    | 83         | yes        | 100%                             | no                       |                                                                              |
| <b>AG30</b>    | 41         | yes        | 100%                             | no                       |                                                                              |
| <b>AG31</b>    | 132        | yes        | 35%                              | yes                      | Diverse prophages                                                            |
| <b>AG32</b>    | 66         | yes        | 88%                              | no                       |                                                                              |
