# Supplementary material
Source: PubMed Central journal article supplement (PMC5148200)

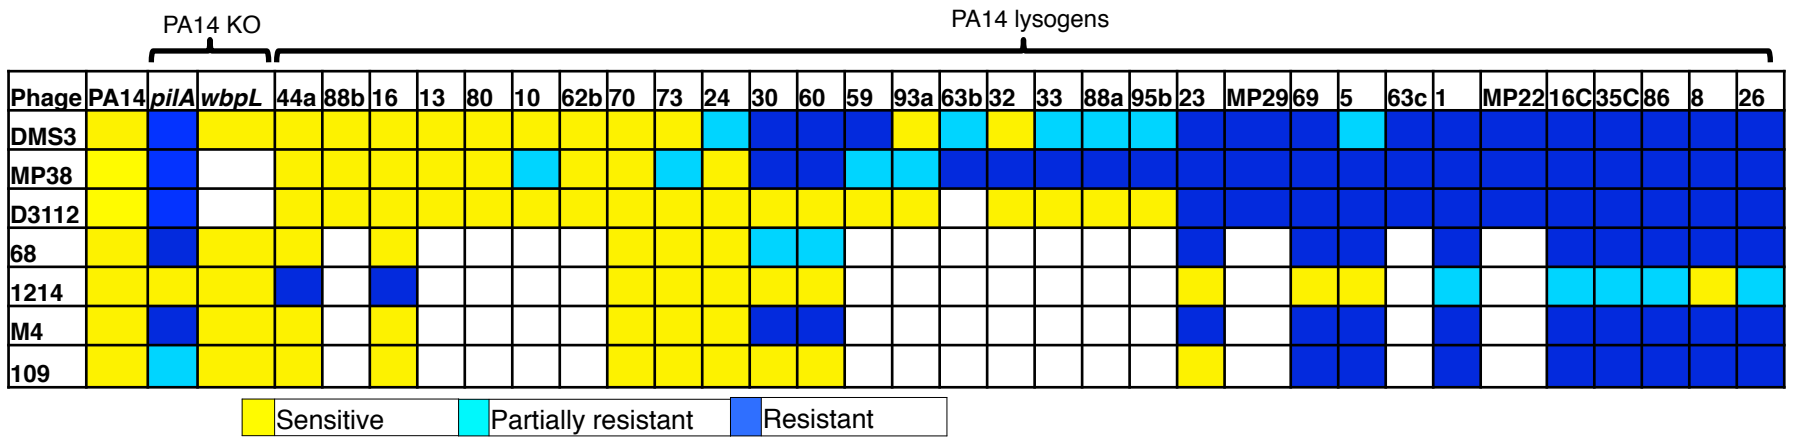

Supplementary Figure S4

Supplement: ismej201679x10.pdf [file ismej201679x10.pdf]

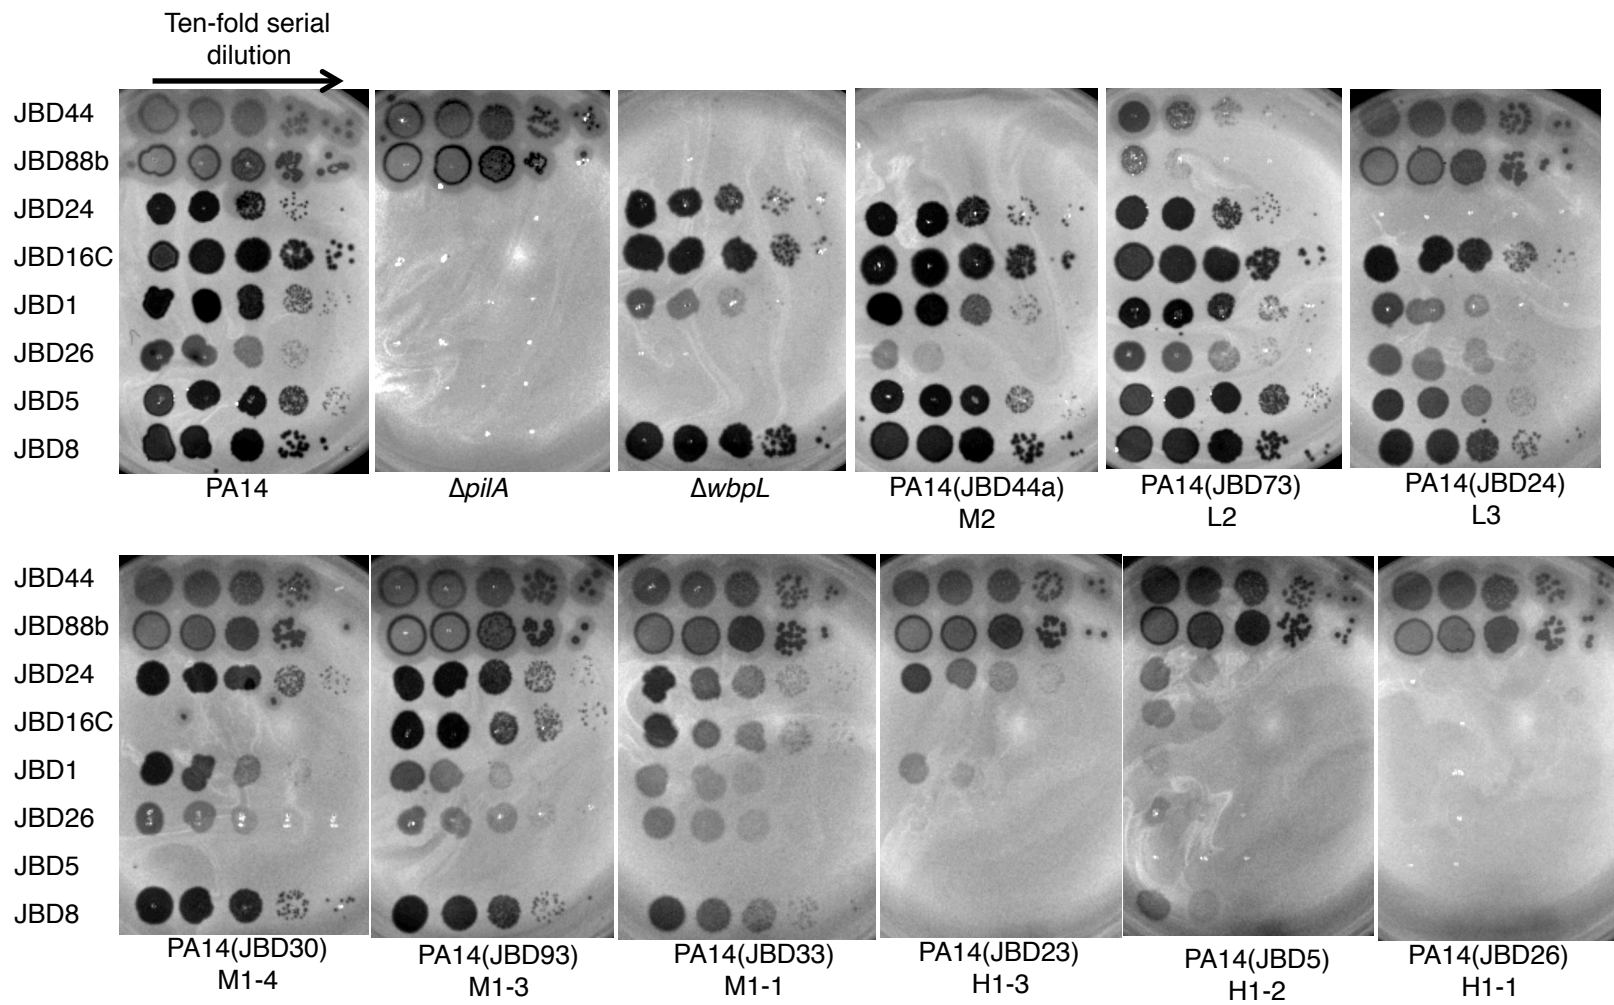

Supplementary Figure S5

Supplement: ismej201679x11.pdf [file ismej201679x11.pdf]

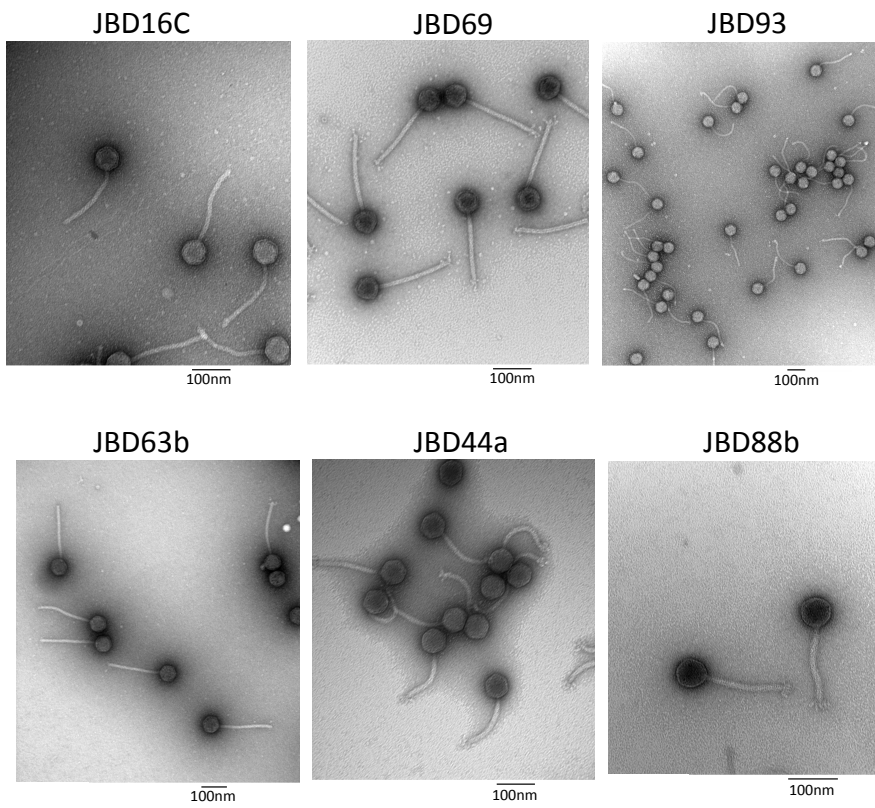

**Supplementary Figure S6**

Supplement: ismej201679x12.pdf [file ismej201679x12.pdf]

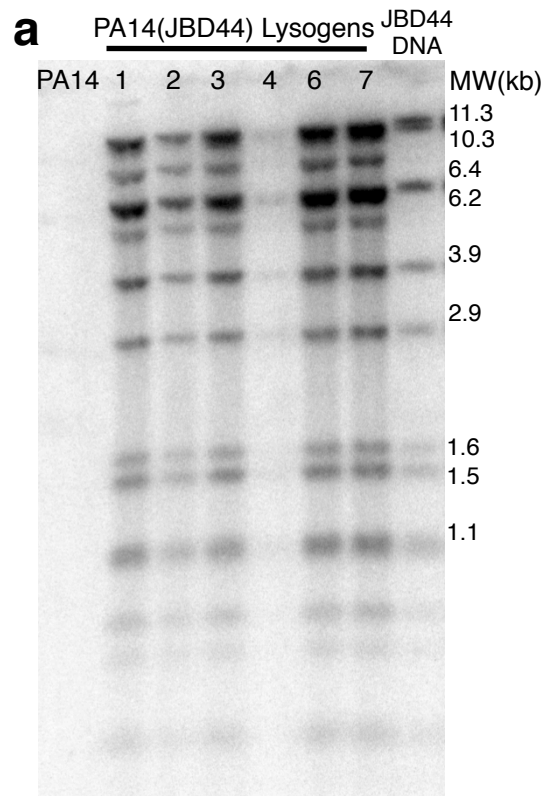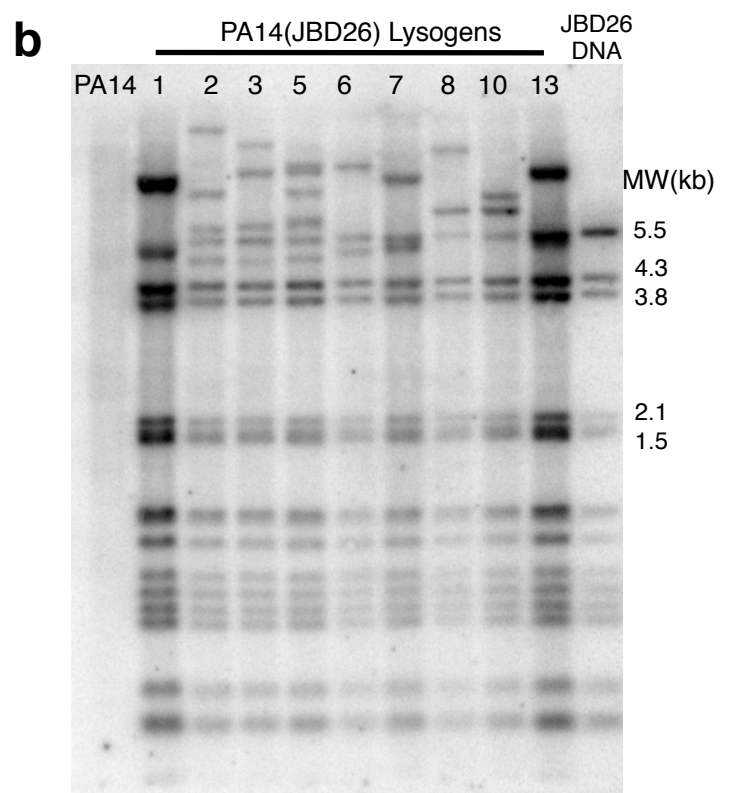

**Supplementary Figure 7**

Supplement: ismej201679x13.pdf [file ismej201679x13.pdf]

**a**

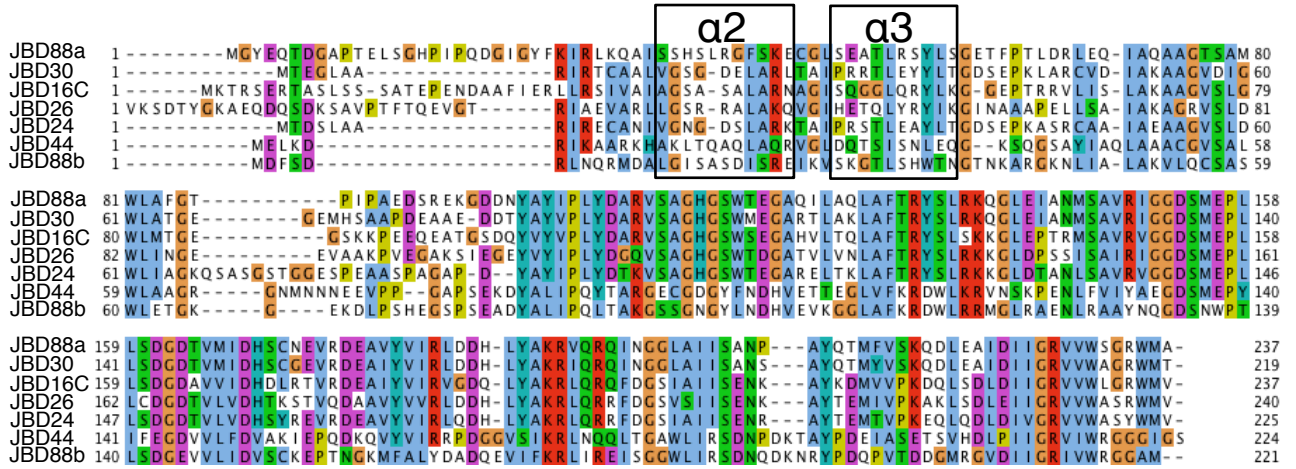

**b**

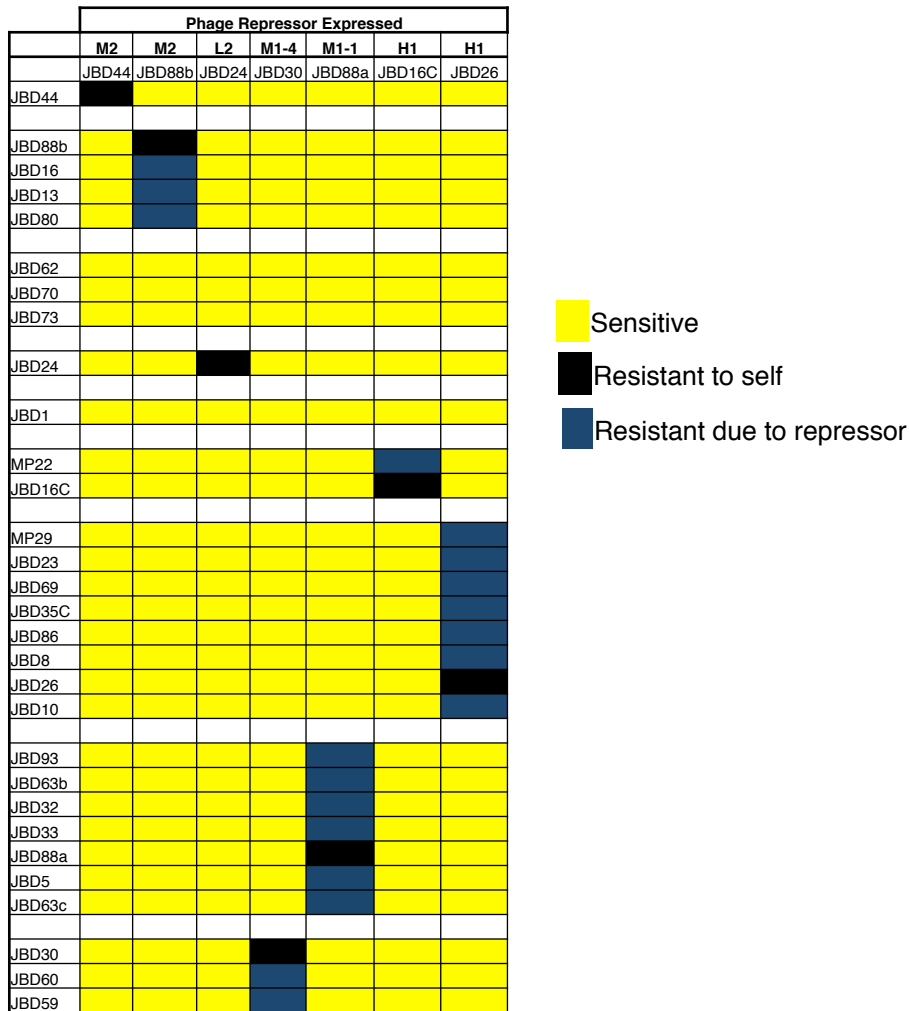

Supplementary Figure S8

Supplement: ismej201679x14.pdf [file ismej201679x14.pdf]

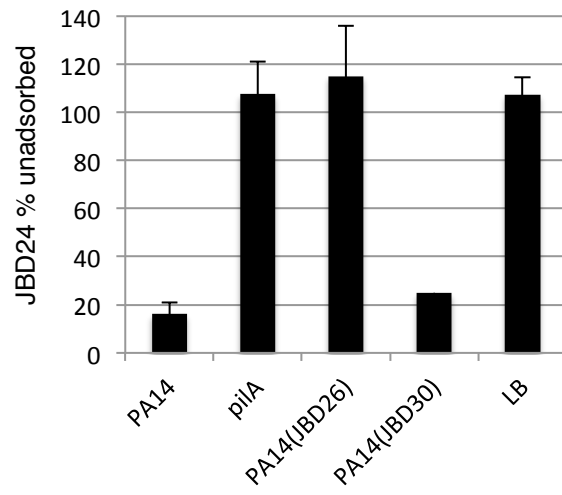

**Supplementary Figure S9**

Supplement: ismej201679x15.pdf [file ismej201679x15.pdf]

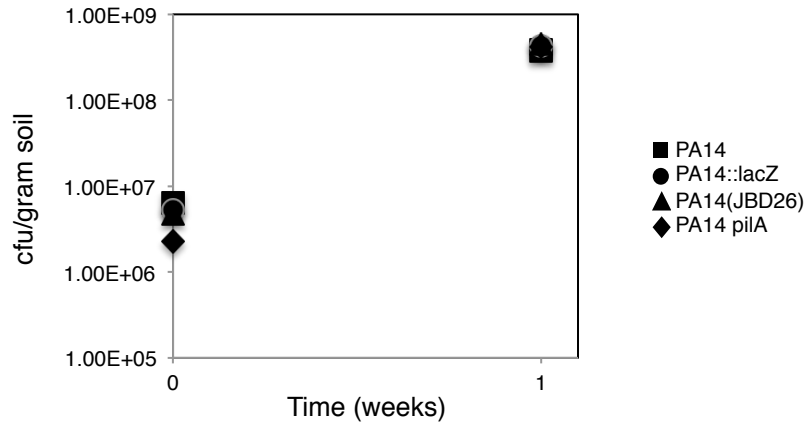

**Supplementary Figure S10**

Supplement: ismej201679x16.pdf [file ismej201679x16.pdf]

Tree scale: 0.01

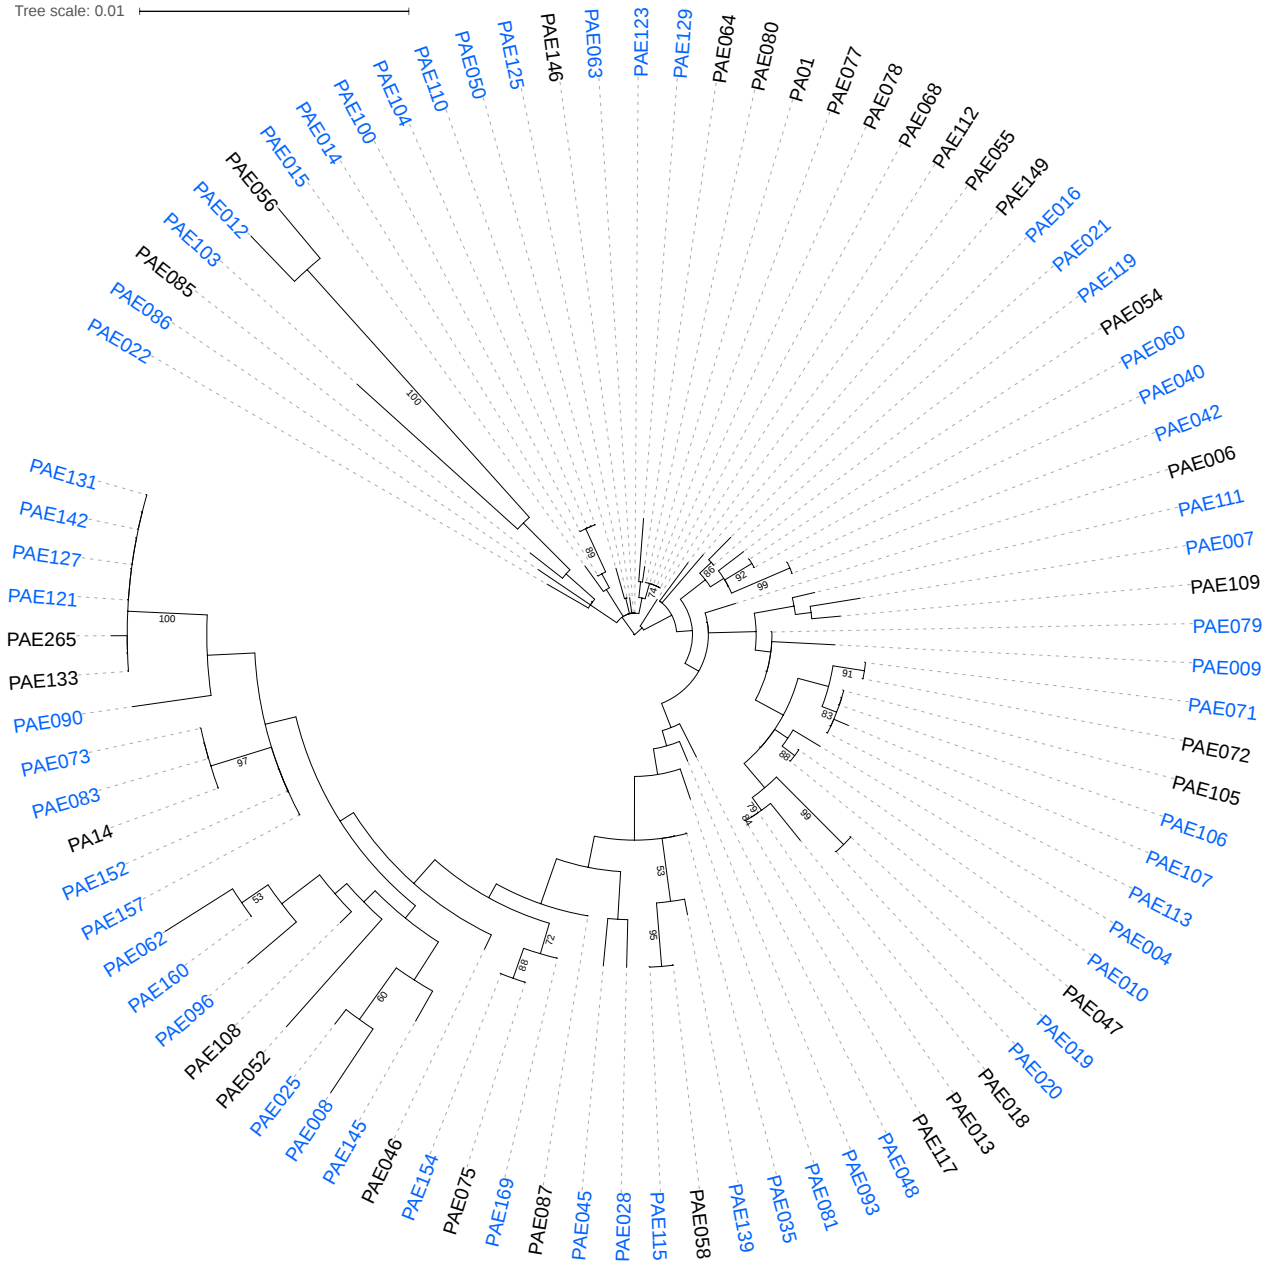

**Supplementary Figure S1**

Supplement: ismej201679x7.pdf [file ismej201679x7.pdf]

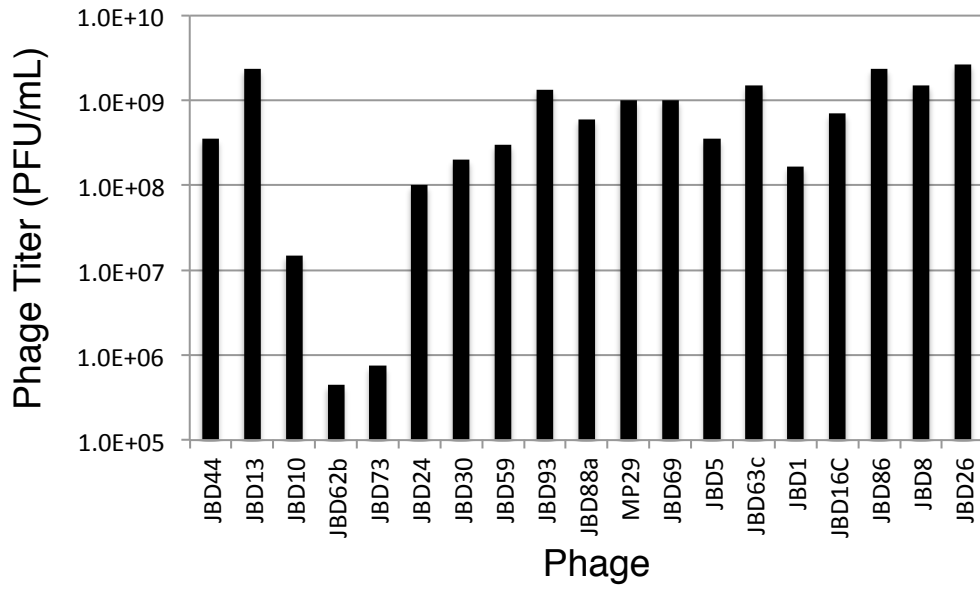

**Supplementary Figure S3**

Supplement: ismej201679x9.pdf [file ismej201679x9.pdf]
